# Supplementary material
Source: PubMed Central journal article supplement (PMC5994929)
Supplement: NIHMS966337-supplement.pdf [file NIHMS966337-supplement.pdf]

# Figure S1

A

| Screen                      | # of worms screened | # of viable RNAi(+) mutants | # of RNAe mutants |
|-----------------------------|---------------------|-----------------------------|-------------------|
| F1                          | 1M                  | 0                           | 0                 |
| F2                          | 1M                  | 1                           | 0                 |
| F3                          | 1M                  | 292                         | 34                |
| F4                          | 2M                  | 375                         | 23                |
| control<br>(without<br>ENU) | 1M                  | 0 viable                    |                   |

B

*nrde-1*  
*nrde-2*  
*nrde-4*  
  
*wago-1*  
*wago-9/hrde-1*  
  
*hpl-2*  
*mes-2*  
*mes-3*  
*mes-4*  
*mes-6*  
*set-25*  
*set-32*

C

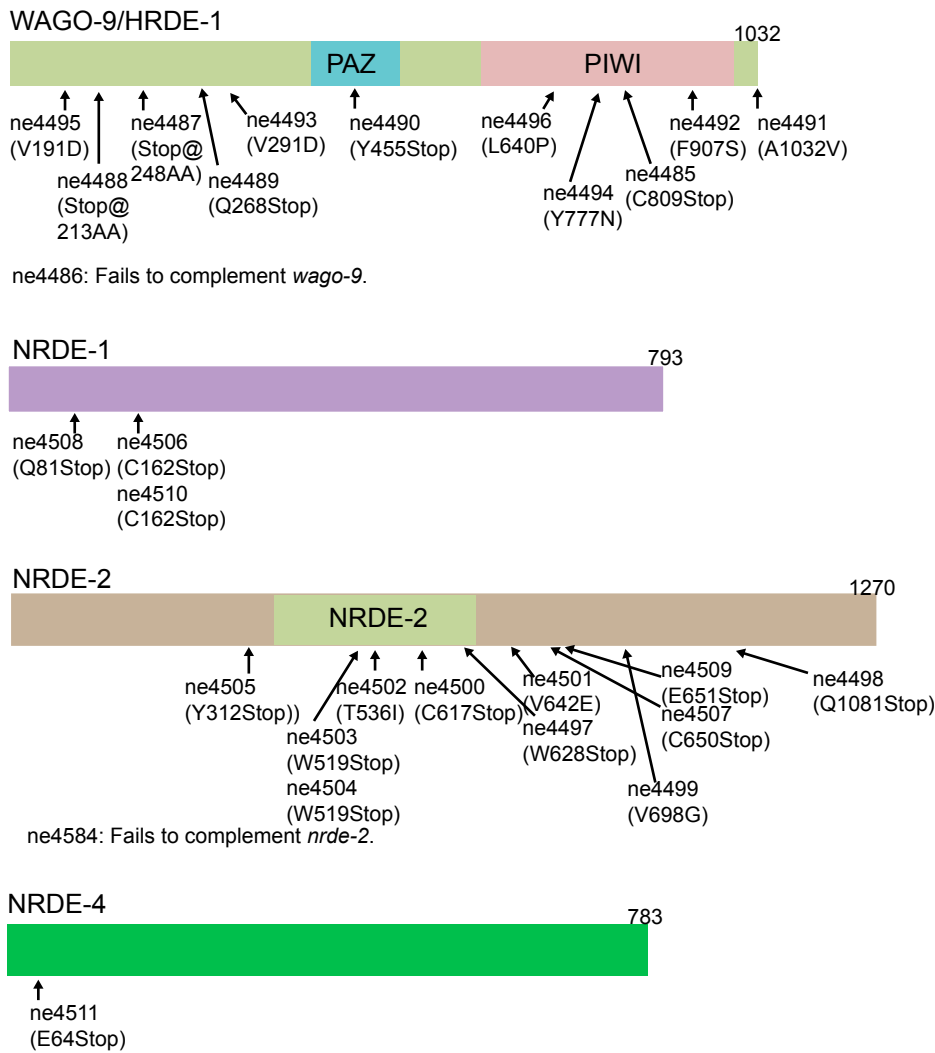

**Figure S1. Detail of the screen. Related to Figure 1.**

(A) Table summarizing the screen. M indicates million.

(B) List of candidate genes subjected to bulk targeted sequencing approach using the PCR-amplicon library.

(C) Schematic diagram depicting the architecture of predicted domains as well as the positions and the nature of the mutations of isolated mutants indicated.

Figure S2

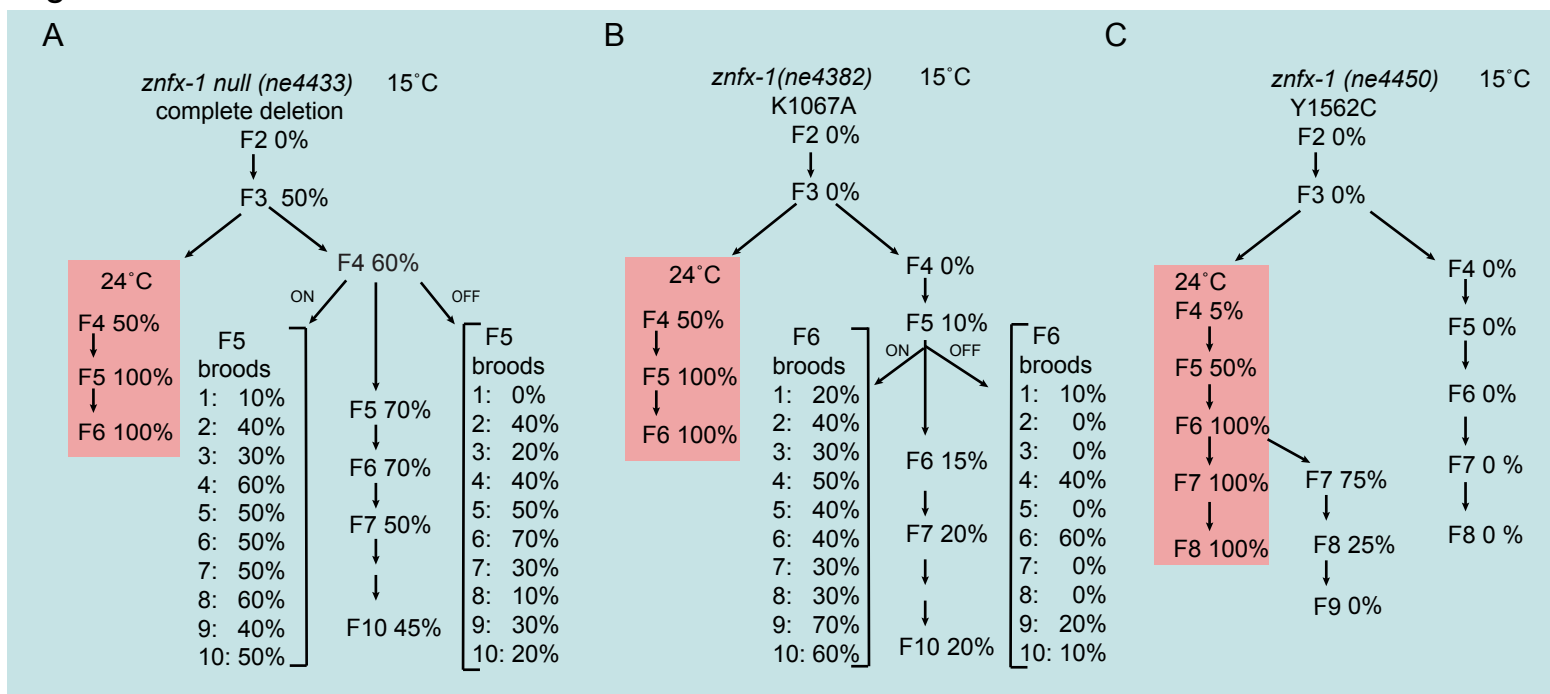

**Figure S2. Temperature dependence of RNAe defect of *znfx-1* mutants. Related to Figure 2.**

(A-C) Schematic diagram depicting the expression states of *cdk-1::gfp* transgene across generations following the CRISPR induction of complete deletion of *znfx-1* (A), of K1067A mutation (B) or of Y1562C mutation (C) in the starting strain, at 24°C (light red background) and 15°C (light blue background). At each generation ~100 L1 larvae were transferred to fresh plate and 10 hermaphrodites were randomly picked and scored for *cdk-1::gfp* expression. Ten animals from the F4 generation (complete deletion) or F5 generation (K1067A) that scored ON or OFF at 15°C were individually recovered from the slides, and *cdk-1::gfp* expression states were scored in the next generation.

# Figure S3

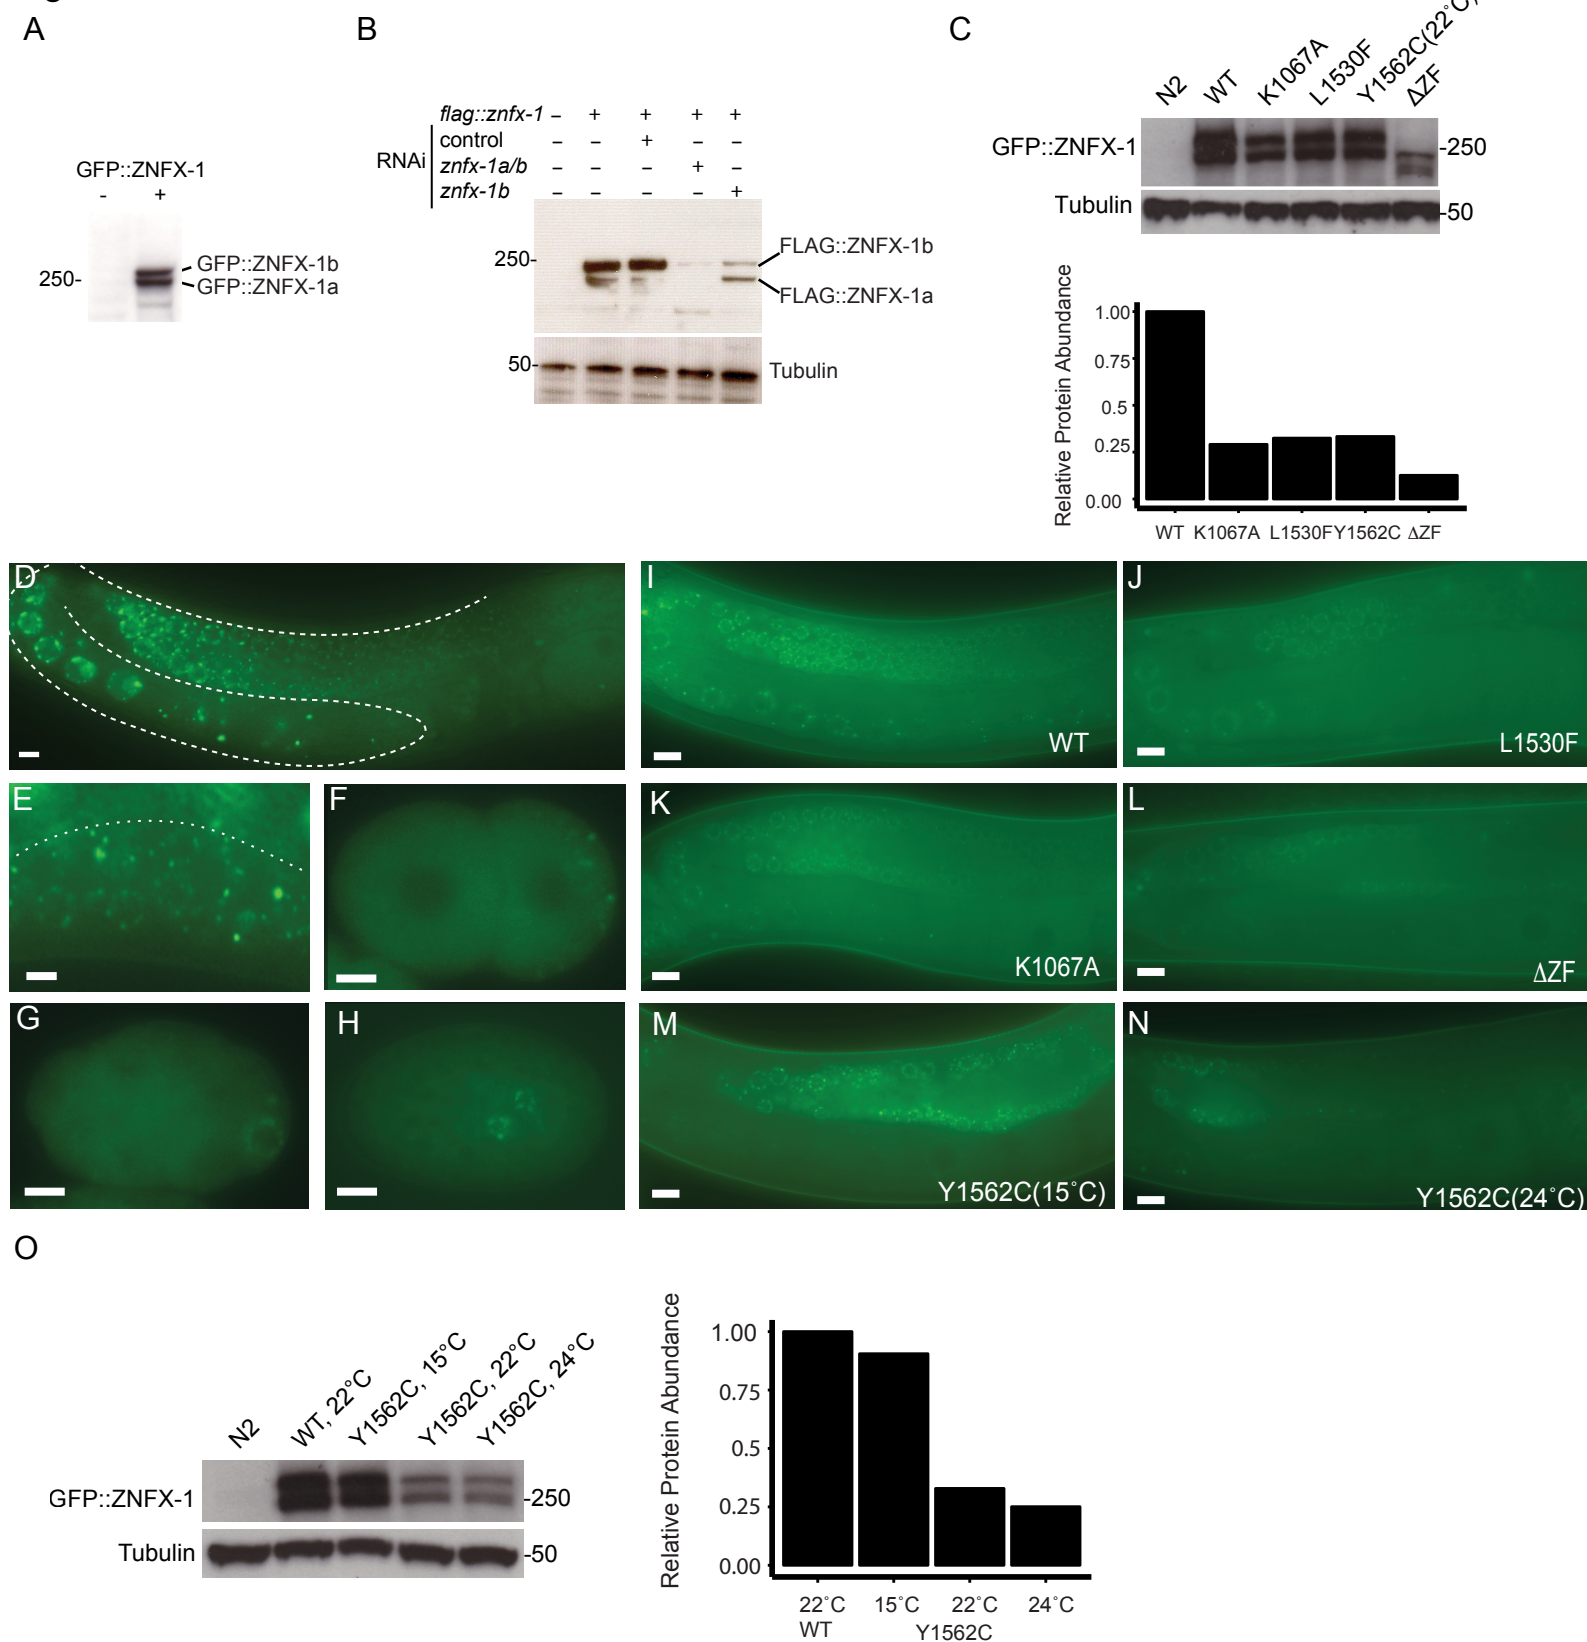

**Figure S3. Expression and localization of wild-type ZNFX-1 protein and mutant proteins harboring various mutations. Related to Figure 2.**

**(A)** Western blot using  $\alpha$ -GFP antibody, analyzing the expression of GFP::ZNFX-1 protein.

**(B)** Western blot using  $\alpha$ -flag antibody, analyzing the expression of 3Xflag::ZNFX-1 proteins in the lysate prepared from animals exposed to indicated RNAi food as described in Figure 2A.

**(C)** Western blot using  $\alpha$ -GFP antibody, analyzing the expression of GFP::ZNFX-1 proteins harboring indicated mutations. Lower panel indicates relative amounts of wildtype and mutant ZNFX-1 proteins after normalized to tubulin levels.

**(D to H)** Fluorescent micrographs indicating the localization of GFP::ZNFX-1 in germline of adult (D), L2 larvae (E), two-cell stage embryo (F), and later stage embryos (G and H). Scale bars represent 5  $\mu$ m.

**(I to N)** Fluorescent micrographs of representative germline of animals expressing indicated GFP::ZNFX-1 proteins. Scale bars represent 10  $\mu$ m.

**(O)** Western blot using  $\alpha$ -GFP antibody, analyzing the expression levels of indicated GFP::ZNFX-1 proteins at the indicated temperatures. Right panel indicates relative protein amounts after normalized to tubulin levels.

Figure S4

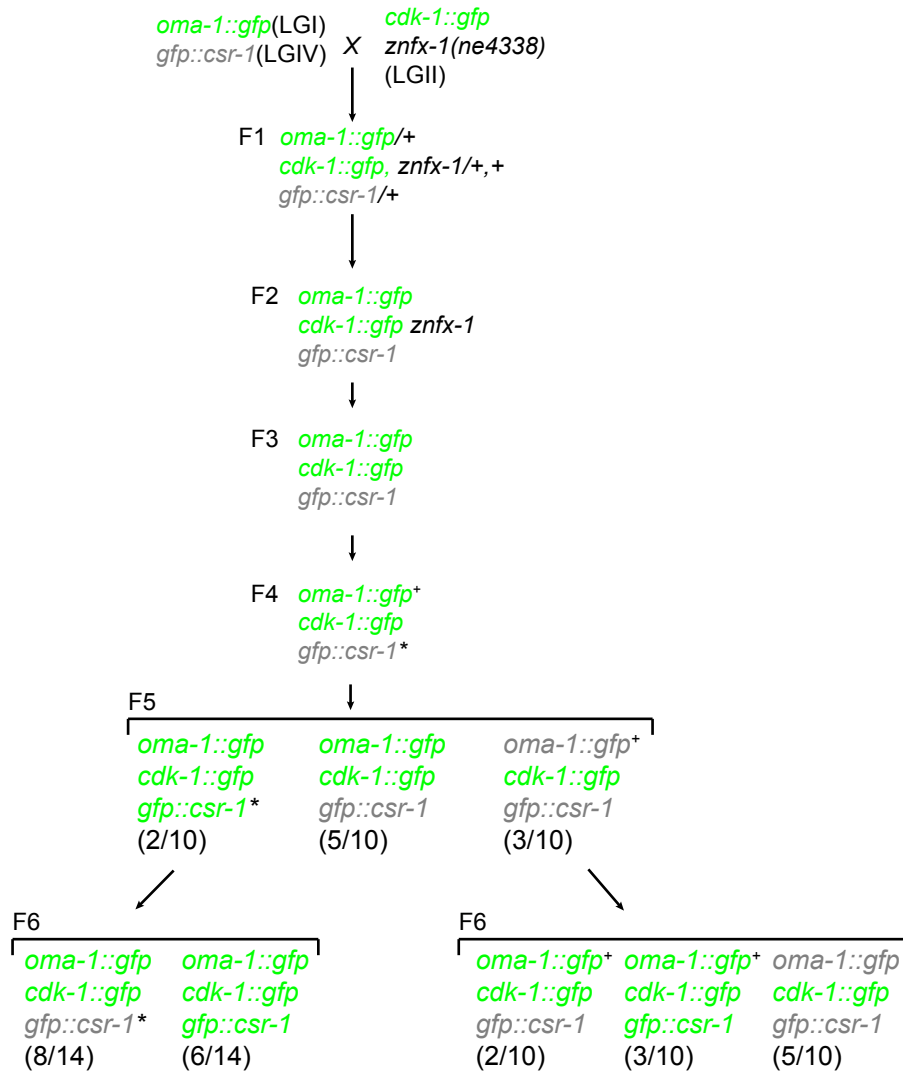

**Figure S4. Variagation of transgene expression across generations. Related to Figure 4.**

Schematic diagram depicting the expression states of transgenes after the cross described in Figure 4. F2 animals homozygous for all the transgenes were followed by transferring ~100 L1s to fresh plate at each generation and checking 10 randomly picked young adult hermaphrodites for GFP expression. Green color represents expressed transgene while gray represents non-expressed transgene. The transgene expression variagated in F5 and each scored animals were individually recovered and checked again in F6 for vaiagation across generation. For example, ON *oma-1::gfp* transgene in F4 designated with “+” could be silenced in F5 and again expressed in F6. Likewise, OFF *gfp::csr-1* transgene in F4 designated with “\*” could be expressed in F5 and again silenced in F6.

Figure S5

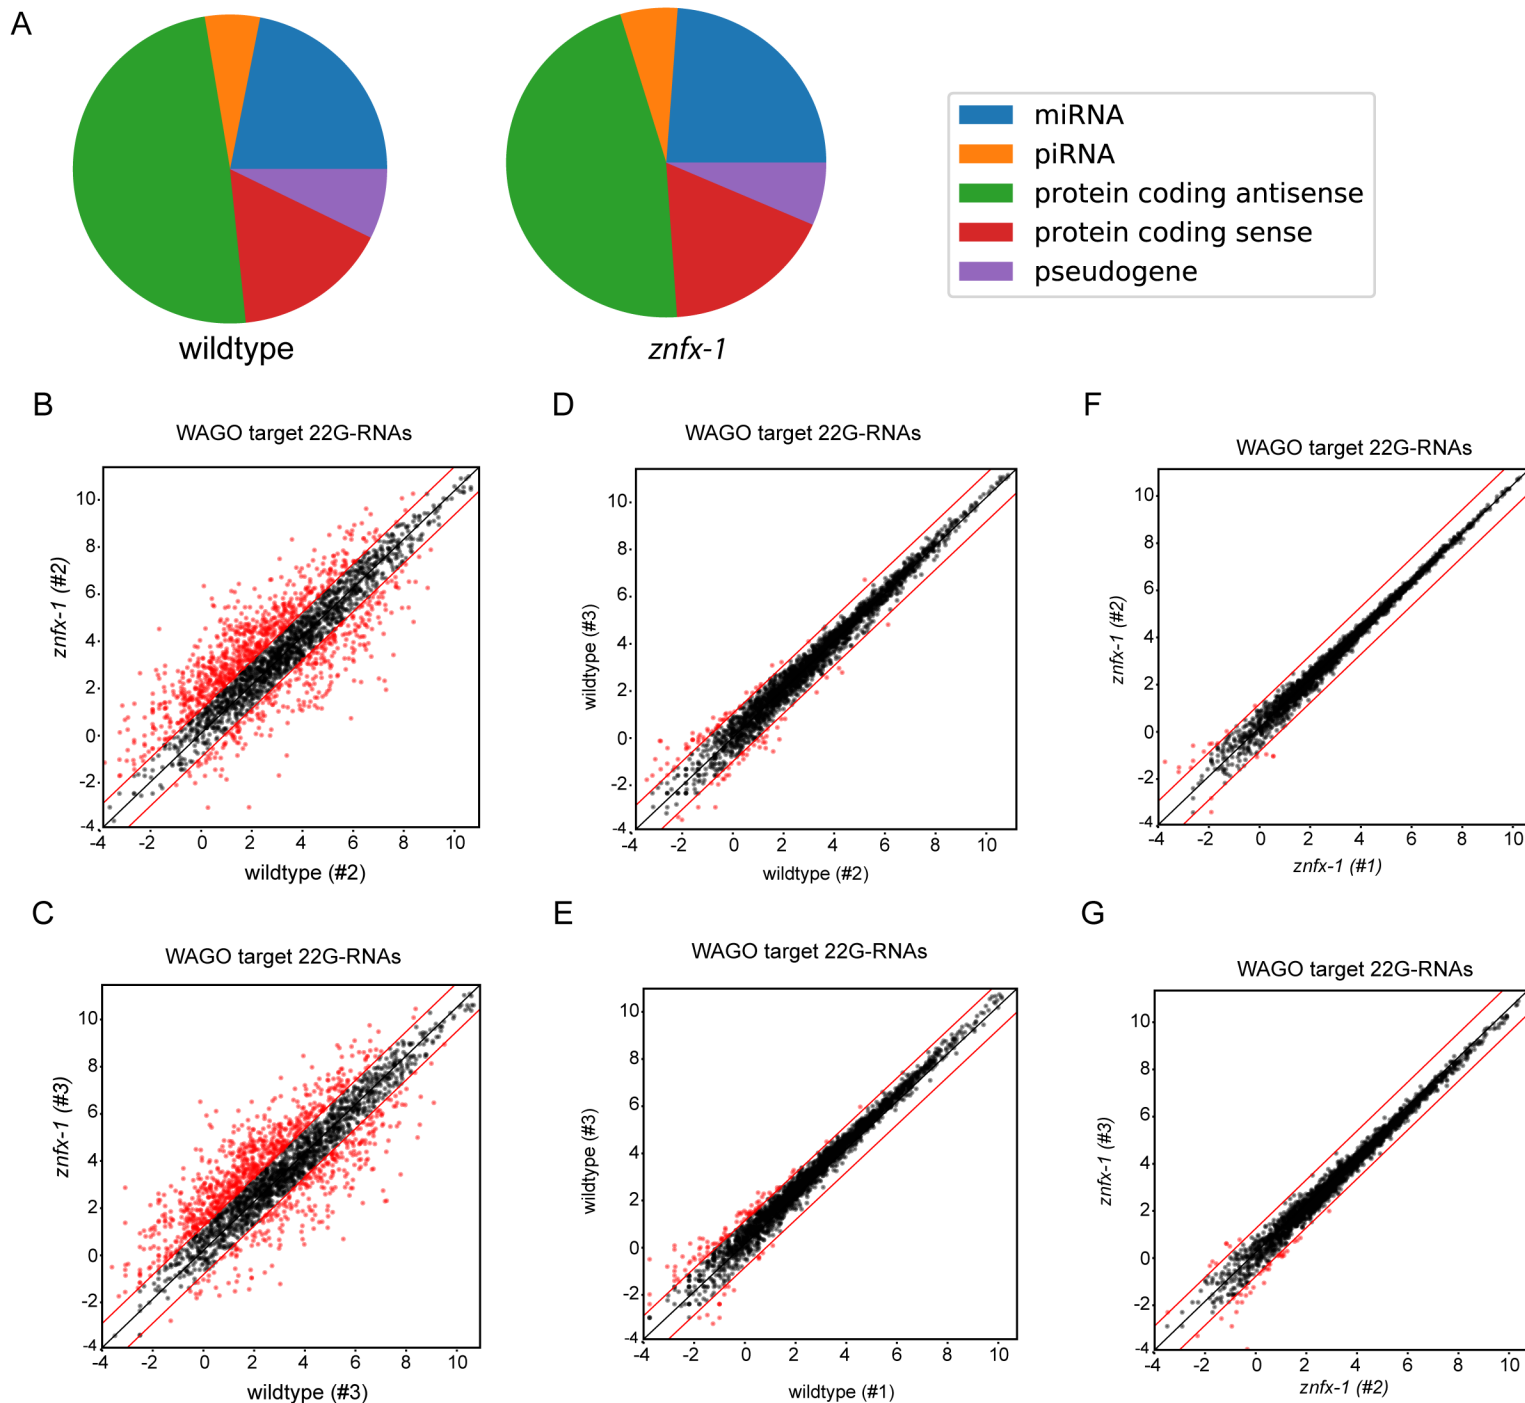

**Figure S5. Small RNA profile and WAGO target 22Gs in *znfx-1* mutant. Related to Figure 6.**

**(A)** Pie charts depicting the distribution of reads that match indicated genome annotation sequenced in wildtype and *znfx-1* mutant small RNA libraries

**(B and C)** Scatter plots comparing the numbers of small RNA reads (log<sub>2</sub>) of WAGO targets cloned from wildtype or *znfx-1* mutant as in Figure 6(A).

**(D and E)** Scatter plots as in (B and C) but comparing two independent wildtype populations.

**(F and G)** Scatter plots as in (B and C) but comparing two independent *znfx-1* populations.

Figure S6

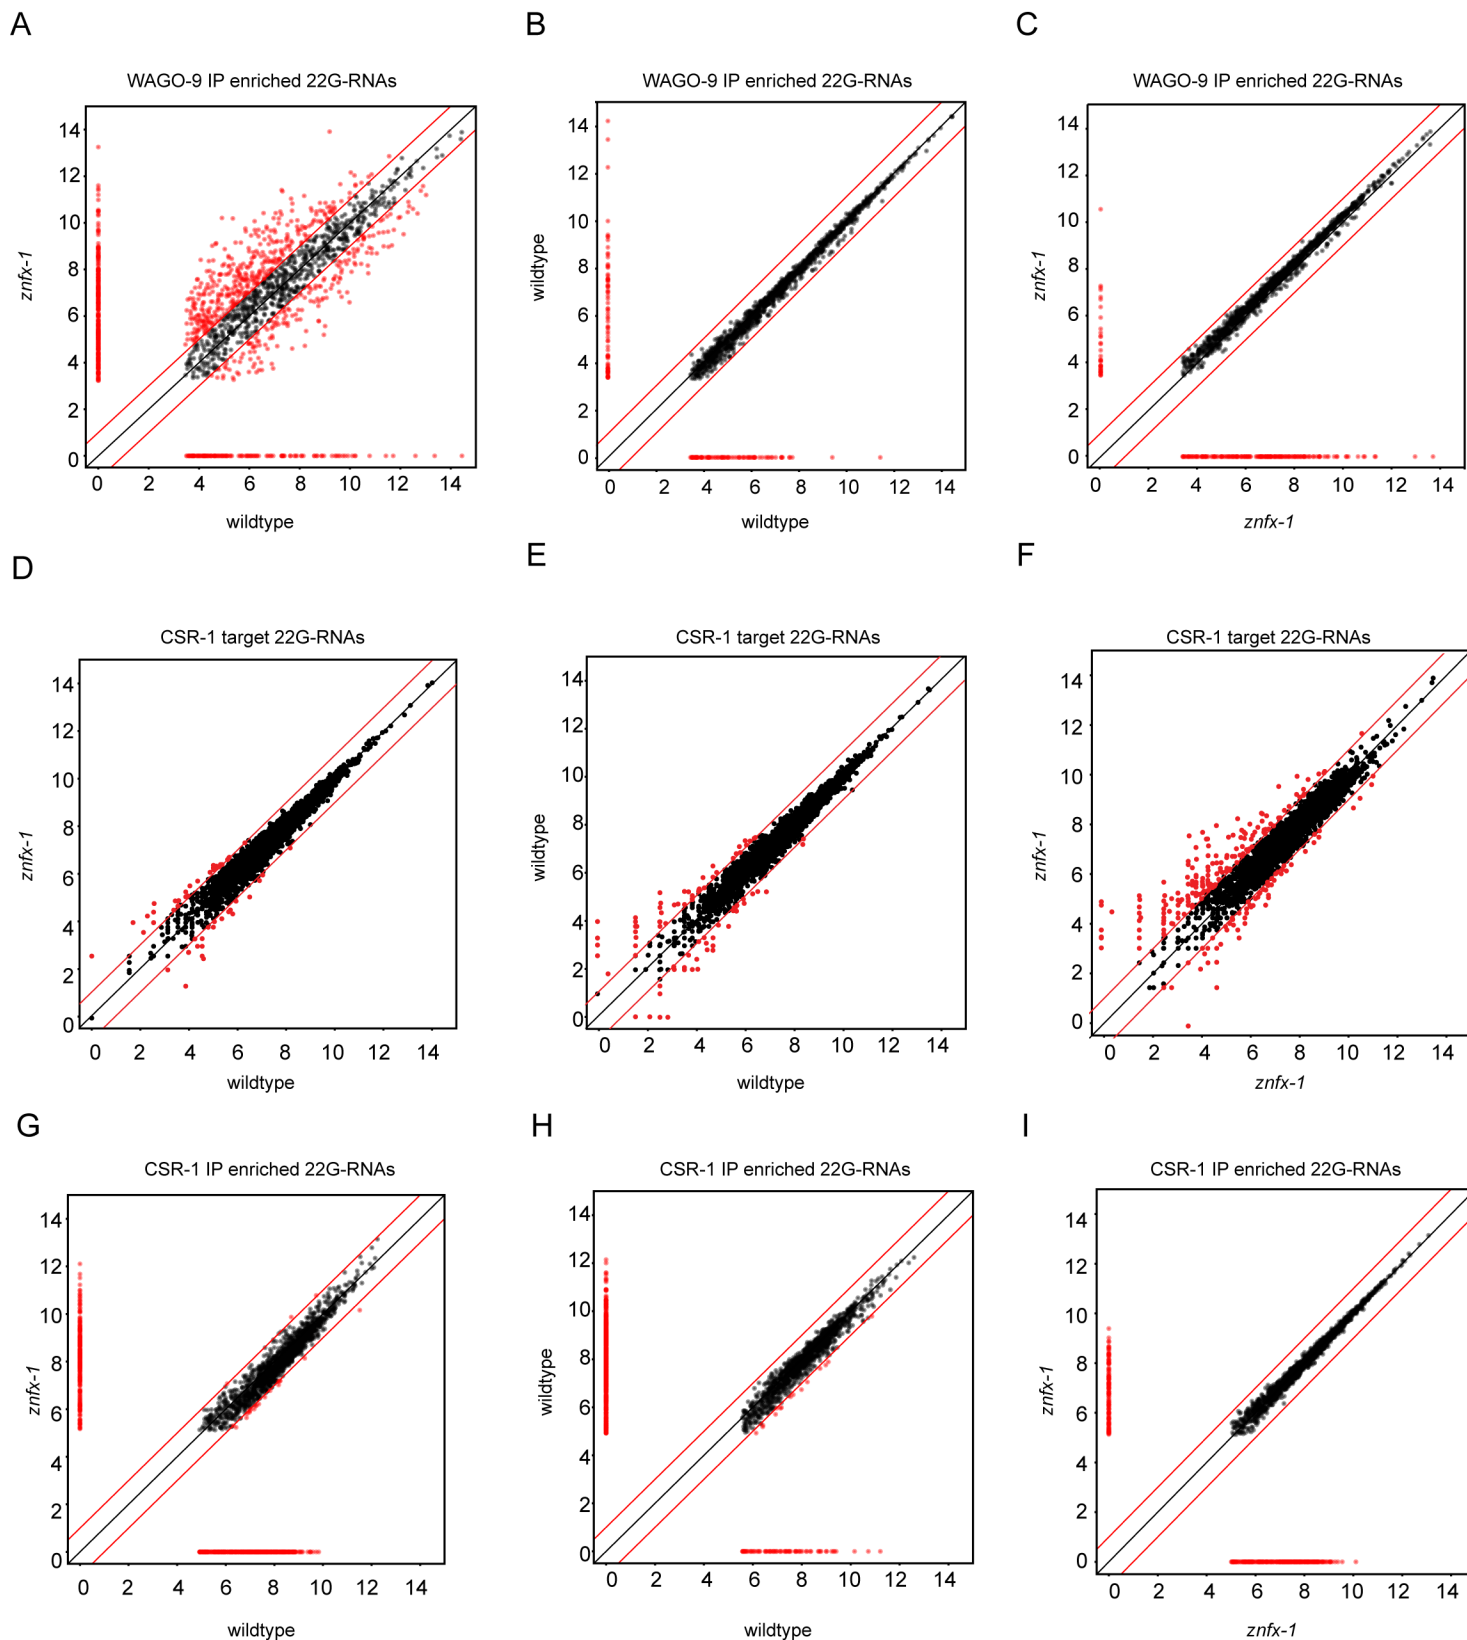

**Figure S6. WAGO-9 bound 22Gs, CSR-1 target 22Gs, and CSR-1 bound 22Gs in *znfx-1* mutant. Related to Figure 6.**

**(A to C)** Scatter plots comparing the numbers of small RNA reads (log<sub>2</sub>) enriched in WAGO-9 IP from wildtype or *znfx-1* mutant (A), two independent wildtype populations (B) or two independent *znfx-1* populations (C). Each dot represents a gene. Dots in red represent genes with greater than 2-fold change.

**(D to F)** Scatter plots comparing the numbers of small RNA reads (log<sub>2</sub>) of CSR-1 targets cloned from wildtype or *znfx-1* mutant (D), two independent wildtype populations (E) or two independent *znfx-1* populations (F). Each dot represents a gene. Dots in red represent genes with greater than 2-fold change.

**(G to I)** Scatter plots comparing the numbers of small RNA reads (log<sub>2</sub>) enriched in CSR-1 IP from wildtype or *znfx-1* mutant (A), two independent wildtype populations (B) or two independent *znfx-1* populations (C). Each dot represents a gene. Dots in red represent genes with greater than 2-fold change.

Figure S7

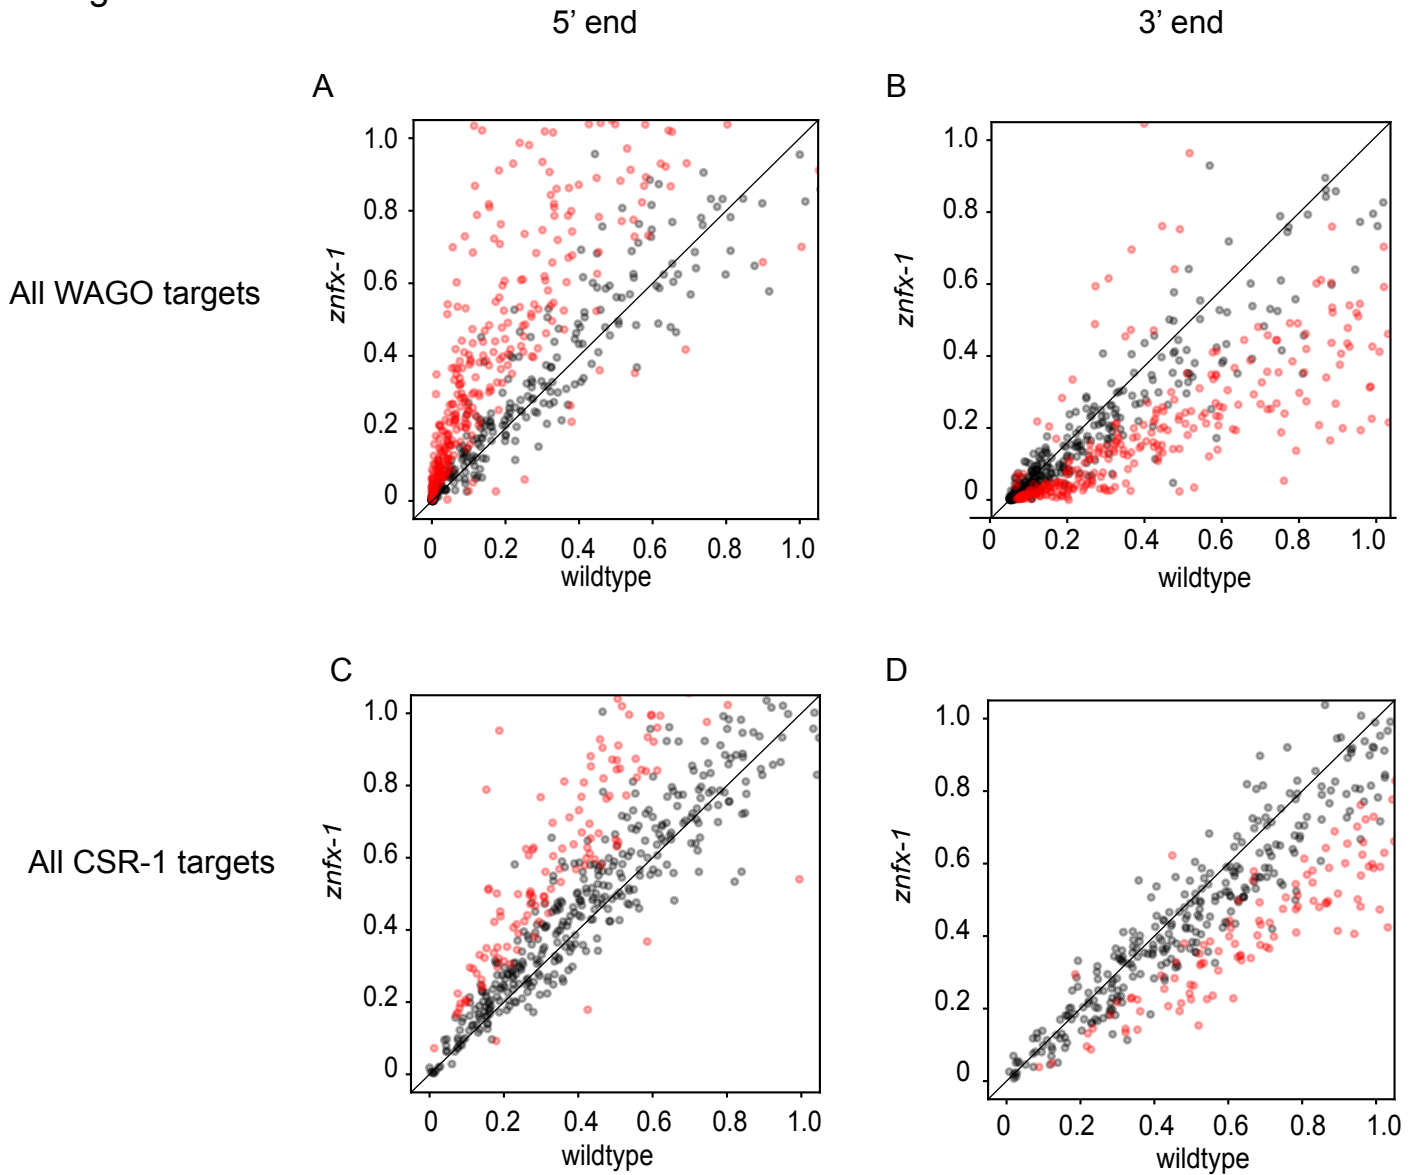

**Figure S7. Scatter plots comparing 22G levels at 5' and 3' end of genes. Related to Figure 6.**

**(A and B)** Scatter plots comparing the numbers of genewise-normalized small RNA reads of WAGO targets cloned from wildtype or *zntfx-1* in 6 replicates, targeting 5' 10% (A) or 3' 10% (B) of genes. Each dot represents a gene. Dots in red represent genes with statistically significant changes (p value < 0.05).

**(C and D)** Scatter plots comparing the numbers of genewise-normalized small RNA reads of CSR-1 targets cloned from wildtype or *zntfx-1* in 6 replicates, targeting 5' 10% (A) or 3' 10% (B) of genes. Each dot represents a gene. Dots in red represent genes with statistically significant changes (p value < 0.05).

**Supplementary Table 1. List of Strains. Related to Star Method.**

WM296 *prg-1(tm872)* I; *neSi11[gfp::cdk-1(RNAe) cb-unc-119(+)]* II; *unc-119(ed9)* III

WM348 *csr-1(ne4520[flag::TEV::csr-1])* IV

WM462 *lin-11(ne832)* I; *neSi14[cdk-1::gfp (RNAe) cb-unc-119(+)]* II; *unc-119(ed9) cdk-1(ne2257)* III; *neSi10[gfp::csr-1 (RNAe) cb-unc-119(+)]* IV

WM491 *lin-11(ne4519) neSi28[oma-1::gfp (RNAa) cb-unc-119(+)]* I; *neSi14[cdk-1::gfp cb-unc-119(+)]* II; *cdk-1(ne2257)III*; *neSi10[gfp::csr-1(RNAe) cb-unc-119(+)]* IV

WM492 *dpy-10(e128) neSi11[gfp::cdk-1(RNAe) cb-unc-119(+)]* II; *unc-119(ed9)* III

WM493 *dpy-10(e128) neSi8[gfp::csr-1(RNAe) cb-unc-119(+)]* II; *unc-119(ed9)* III

WM494 *lin-11(ne832)* I; *neSi14[cdk-1::gfp, cb-unc-119(+)] znf-1(ne4338)* II; *unc-119(ed9) cdk-1(ne2257)* III; *neSi10[gfp::csr-1, cb-unc-119(+)]* IV

WM495 *lin-11(ne832)* I; *neSi14[cdk-1::gfp, cb-unc-119(+)] znf-1(ne4354)* II; *unc-119(ed9) cdk-1(ne2257)* III; *neSi10[gfp::csr-1, cb-unc-119(+)]* IV

WM496 *lin-11(ne832)* I; *neSi14[cdk-1::gfp, cb-unc-119(+)] znf-1(ne4415)* II; *unc-119(ed9) cdk-1(ne2257)* III; *neSi10[gfp::csr-1, cb-unc-119(+)]* IV

WM497 *neSi14[cdk-1::gfp, cb-unc-119(+)] znf-1(ne4384)* II; *unc-119(ed9) cdk-1(ne2257)* III; *neSi10[gfp::csr-1, cb-unc-119(+)]* IV

WM498 *neSi14[cdk-1::gfp, cb-unc-119(+)] znf-1(ne4381[Δzinc finger])* II; *unc-119(ed9) cdk-1(ne2257)* III; *neSi10[gfp::csr-1, cb-unc-119(+)]* IV

WM499 *neSi14[cdk-1::gfp, cb-unc-119(+)] znf-1(ne4399[Δhelicase])* II; *unc-119(ed9) cdk-1(ne2257)* III; *neSi10[gfp::csr-1, cb-unc-119(+)]* IV

WM500 *neSi14[cdk-1::gfp, cb-unc-119(+)] znf-1(ne4433[complete deletion])* II; *unc-119(ed9) cdk-1(ne2257)* III; *neSi10[gfp::csr-1, cb-unc-119(+)]* IV

WM523 *neSi14[cdk-1::gfp, cb-unc-119(+)] znf-1(ne4449)* II; *unc-119(ed9) cdk-1(ne2257)* III; *neSi10[gfp::csr-1, cb-unc-119(+)]* IV

WM524 *neSi14[cdk-1::gfp, cb-unc-119(+)] znf-1(ne4450)* II; *unc-119(ed9) cdk-1(ne2257)* III; *neSi10[gfp::csr-1, cb-unc-119(+)]* IV

WM525 *neSi14[cdk-1::gfp, cb-unc-119(+)] znf-1(ne4353)* II; *unc-119(ed9) cdk-1(ne2257)* III; *neSi10[gfp::csr-1, cb-unc-119(+)]* IV

WM501 *znfx-1(ne4352[GFP::ZNFX-1])*

WM502 *znfx-1(ne4404[GFP::ZNFX-1[L1530F]])*

WM503 *znfx-1(ne4383[GFP::ZNFX-1[K1067A]])*

WM504 *znfx-1(ne4513[GFP::ZNFX-1[Δzinc finger]])*

WM505 *znfx-1(ne4459[GFP::ZNFX-1[Y1562C]])*

WM506 *znfx-1(ne4355[3Xflag::TEV::ZNFX-1])*

WM507 *neSi14[cdk-1::gfp (RNAe) cb-unc-119(+)] znf-1(ne4338)*

WM508 *neSi14[cdk-1::gfp (RNAe) cb-unc-119(+)] znf-1(ne4354)*

WM509 *znfx-1(ne4352[GFP::ZNFX-1]); mCherry::pgl-1*

WM510 *znfx-1(ne4352[GFP::ZNFX-1]); csr-1(ne4515[mCherry::CSR-1])*

WM511 *znfx-1(ne4352[GFP::ZNFX-1]); csr-1(tm892)/DnT1*

WM512 *znfx-1(ne4352[GFP::ZNFX-1]); glh-1(ok439)*

WM513 *neSi14[cdk-1::gfp (+) cb-unc-119(+)] II unc-4(ne4516) znf-1(ne4338): unc-119(ed9) cdk-1(ne2257) III*

WM514 *ego-1(ne4518[GFP::EGO-1]) I; znf-1(ne4355[3Xflag::TEV::ZNFX-1])II*

WM515 *znfx-1(ne4352[GFP::ZNFX-1])II; csr-1(ne4520[3Xflag::CSR-1])IV*

WM516 *znfx-1(ne4352[GFP::ZNFX-1])II; wago-9(ne4336[3Xflag::TEV::WAGO-9])III*

WM517 *wago-1(ne4585[3Xflag::TEV::SNAP::WAGO-1])I; znf-*



1(ne4352[GFP::ZNF-1])II;  
WM518 znfx-1(ne4352[GFP::ZNF-1])II; prg-1(ne4586[flag::TEV::PRG-1])  
WM519 znfx-1(ne4354) II; csr-1(ne4520[flag::TEV::CSR-1]) IV  
WM520 znfx-1(ne4354) II; wago-9(ne4336[flag::TEV::WAGO-9]) IV  
WM521 wago-9(ne4336[3Xflag::TEV::WAGO-9])III  
WM522 ego-1(ne4518[GFP::EGO-1])I  
WM603 wago-1(ne4585[3Xflag::TEV::SNAP::WAGO-1])I  
WM604 prg-1(ne4586[flag::TEV::PRG-1])I  
WM605 prg-1(tm872);znfx-1(ne4338)

**Supplementary Table 2. Related to Figure 6. Distribution of reads in the small RNA libraries used in the study.**

| Sample                   | total reads | structural(%) | piRNA(%) | miRNA(%) | 22G(%) |
|--------------------------|-------------|---------------|----------|----------|--------|
| csr-1(IP)input_wt_1      | 14.99       | 8.99          | 3.21     | 8.02     | 12.46  |
| csr-1(IP)input_wt_2      | 21.22       | 4.43          | 3.10     | 7.65     | 14.89  |
| csr-1(IP)input_wt_3      | 18.07       | 6.21          | 3.36     | 6.14     | 15.78  |
| wago-9(IP)input_wt_1     | 24.66       | 5.19          | 3.03     | 9.47     | 12.31  |
| wago-9(IP)input_wt_2     | 15.93       | 8.21          | 3.17     | 7.72     | 13.38  |
| wago-9(IP)input_wt_3     | 18.97       | 12.38         | 2.88     | 6.98     | 12.68  |
| csr-1(IP)input_znfx-1_1  | 17.10       | 5.39          | 3.37     | 8.30     | 13.49  |
| csr-1(IP)input_znfx-1_2  | 18.89       | 3.93          | 3.58     | 7.37     | 15.27  |
| csr-1(IP)input_znfx-1_3  | 24.10       | 7.17          | 3.54     | 6.31     | 14.90  |
| wago-9(IP)input_znfx-1_1 | 21.10       | 8.24          | 3.23     | 7.79     | 14.62  |
| wago-9(IP)input_znfx-1_2 | 19.74       | 4.75          | 2.45     | 8.15     | 16.38  |
| wago-9(IP)input_znfx-1_3 | 19.52       | 5.99          | 3.62     | 5.54     | 17.98  |
| csr1(IP)_wt_1            | 23.52       | 11.26         | 6.66     | 1.86     | 11.58  |
| csr-1(IP)_wt_2           | 21.62       | 5.91          | 1.08     | 1.58     | 13.78  |
| csr-1(IP)_wt_3           | 10.50       | 4.68          | 0.61     | 0.92     | 15.24  |
| csr-1(IP)_znfx-1_1       | 26.84       | 9.79          | 8.09     | 2.22     | 11.33  |
| csr-1(IP)_znfx-1_2       | 12.71       | 4.25          | 0.44     | 1.15     | 15.37  |
| csr-1(IP)_znfx-1_3       | 19.25       | 3.91          | 0.38     | 1.02     | 15.72  |
| wago-9(IP)_wt_1          | 37.31       | 1.37          | 0.10     | 0.18     | 25.97  |
| wago-9(IP)_wt_2          | 18.12       | 1.11          | 0.05     | 0.15     | 27.45  |
| wago-9(IP)_wt_3          | 16.44       | 1.31          | 0.08     | 0.22     | 28.08  |
| wago-9(IP)_znfx-1_1      | 29.08       | 1.12          | 0.10     | 0.21     | 30.62  |
| wago-9(IP)_znfx-1_2      | 23.62       | 1.15          | 0.06     | 0.37     | 33.57  |
| wago-9(IP)_znfx-1_3      | 17.98       | 0.81          | 0.04     | 0.17     | 32.32  |

Total read is in millions.

**Supplementary Table 3. Related to Figure 6. % of genes up or down in 22G targeting in znfx-1 mutant at 5' or 3' 10% of the gene.**

|                | <b>up in znfx</b> | <b>down in znfx</b> | <b>total genes</b> | <b>up %</b> | <b>down %</b> |
|----------------|-------------------|---------------------|--------------------|-------------|---------------|
| <b>csr 5'</b>  | 173               | 9                   | 606                | 28.55       | 1.49          |
| <b>wago 5'</b> | 366               | 39                  | 789                | 46.39       | 4.94          |
|                |                   |                     |                    |             |               |
| <b>csr 3'</b>  | 3                 | 190                 | 606                | 0.50        | 31.35         |
| <b>wago 3'</b> | 27                | 354                 | 789                | 3.42        | 44.87         |

**Table S4. Cold-sensitive RNAi defect of *znfx-1(ne4338)* is suppressed by *prg-1*. Related to Table 1.**

| <b>Genotype</b>                                      | <b><i>pos-1</i> food<br/>% hatching</b> | <b>L4440<br/>% hatching</b> |
|------------------------------------------------------|-----------------------------------------|-----------------------------|
| <b>Wildtype</b>                                      | 0 (4946)                                | 99.7 (1040)                 |
| <b><i>znfx-1(ne4338)</i></b>                         | 4.6 (4414)                              | 99.6 (1299)                 |
| <b><i>prg-1(tm872)</i></b>                           | 0 (4034)                                | 93.3 (907)                  |
| <b><i>prg-1(tm872)</i><br/><i>znfx-1(ne4338)</i></b> | 0 (3833)                                | 94.7 (883)                  |

% of eggs hatching are shown. Numbers in parentheses indicate the numbers of eggs scored.
